# Supplementary material
Source: Royal Society of Chemistry journal article supplement (doi:10.1039/d6fo00519e)
Supplement: d6fo00519e1.pdf [file d6fo00519e1.pdf]

## Supporting Information

### ***Lactobacillus plantarum* Ameliorates High-fat-diet-induced Dyslipidemia via Cholesterol Metabolism and Gut Microbiota Modulation**

Ziyue Zhou,<sup>†a</sup> Yin Mao,<sup>†b</sup> Jinyang,<sup>a</sup> Li Ju Yang,<sup>c</sup> Yihui Zhang,<sup>d</sup> Yunying Zhao,<sup>\*a,b</sup>  
and Yu Deng<sup>\*a,b</sup>

<sup>a</sup> *School of Biotechnology and Key Laboratory of Industrial Biotechnology of Ministry of Education, Jiangnan University, 1800 Lihu Road, Wuxi, Jiangsu 214122, China.  
E-mail: yunyingzhao@jiangnan.edu.cn, dengyu@jiangnan.edu.cn*

<sup>b</sup> *National Engineering Research Center of Cereal Fermentation and Food Biomanufacturing, Jiangnan University, 1800 Lihu Road, Wuxi, Jiangsu 214122, China*

<sup>c</sup> *Nutrition Department (Center for clinical evaluation of functional foods), Jiangnan University Affiliated Hospital, Wuxi, 214122, China*

<sup>d</sup> *School of science/applied chemistry, Xi'an Jiaotong Liverpool University, 111 Ren'ai Road, Suzhou Industrial Park, Suzhou, Jiangsu 215412, China*

<sup>†</sup>These authors contributed equally to this work.

## Supplementary Tables

**Table S1. Primer sequences used in this study.**

| Target gene   | Primer  | Sequences (5→3)        |
|---------------|---------|------------------------|
| GAPDH         | Forward | TCCTGCACCACCAACTGCT    |
|               | Reverse | GTCAGATCCACGACGGACACA  |
| AMPK $\alpha$ | Forward | CAGGAAGATTGTACGCAGGC   |
|               | Reverse | AACCACTCGTGTTCCCTGAT   |
| SREBP2        | Forward | CTCCTCCTGTGGCTGGTAAA   |
|               | Reverse | AGCTGCGAAATCACCTTTGG   |
| HMGCR         | Forward | GCGGCAGCTTGAGATCAT     |
|               | Reverse | AGCTCAGCCATTTTGCCAG    |
| NPC1L1        | Forward | TGGACATACGCTCAGGCATC   |
|               | Reverse | GGTTGATGAGGGACACAGCA   |
| ABCG5         | Forward | TCAATGAGTTTTACGGCCTGAA |
|               | Reverse | GCACATCGGGTGATTTAGCA   |
| ABCG8         | Forward | CTGTGGAATGGGACTGTACTTC |
|               | Reverse | GTTGGACTGACCACTGTAGGT  |

**Table S2** Linear regression equation of six short-chain fatty acid standards

| Number | Name            | Retention time (min) | Linear Equation    | R <sup>2</sup> | linear ranges (mg/mL) |
|--------|-----------------|----------------------|--------------------|----------------|-----------------------|
| 1      | Acetic acid     | 3.189                | $y=716994x-17577$  | 0.9980         | 0.004-2               |
| 2      | Propionic acid  | 3.991                | $y=977218x-8227$   | 0.9997         | 0.004-2               |
| 3      | Isobutyric acid | 4.293                | $y=1967362x-65813$ | 0.9985         | 0.004-2               |
| 4      | Butyric acid    | 4.948                | $y=1456741x-22485$ | 0.9996         | 0.004-2               |
| 5      | isovaleric acid | 5.429                | $y=1945193x-51010$ | 0.9988         | 0.004-2               |
| 6      | Valeric acid    | 5.942                | $y=1458903x+16604$ | 0.9987         | 0.004-2               |
